# Supplementary material for: Neuroimaging Techniques as Descriptive and Diagnostic Tools for Infants at Risk for Autism Spectrum Disorder: A Systematic Review
Source: MDPI journal article supplement (doi:10.3390/brainsci12050602), 2022-05-05
Supplement: s1 [file s1]

**Table S1: Results**

| <b>Authors,<br/>year</b>                 | <b>Title</b>                                                                                                                                                                     | <b>Journal</b>                       | <b>Study design &amp;<br/>Sample Size</b> | <b>Population</b>                                                 | <b>Age range</b>   | <b>Types of<br/>Neuroimaging<br/>Used</b> | <b>Category</b> |
|------------------------------------------|----------------------------------------------------------------------------------------------------------------------------------------------------------------------------------|--------------------------------------|-------------------------------------------|-------------------------------------------------------------------|--------------------|-------------------------------------------|-----------------|
| <b>Bhat et al.,<br/>2019</b>             | Exploring cortical activation and connectivity in infants with and without familial risk for autism during naturalistic interactions: A preliminary study                        | Infant Behavior and Development      | Cross-sectional;<br>N = 15                | ASD-HR (n = 9) and ASD-LR (n = 6) infants                         | 6 - 9 months       | fNIRS                                     | Descriptive     |
| <b>Blasi et al.,<br/>2015</b>            | Atypical processing of voice sounds in infants at risk for autism spectrum disorder                                                                                              | Cortex                               | Cross-sectional;<br>N = 33                | ASD-HR (n = 15) and ASD-LR (n = 18) infants                       | 4 - 7 months       | fMRI                                      | Descriptive     |
| <b>Braukamann et al., 2018</b>           | Diminished socially selective neural processing in 5-month-old infants at high familial risk of autism                                                                           | European Journal of Neuroscience     | Cross-sectional;<br>N = 29                | ASD-HR (n = 16) and ASD-LR (n = 13) infants                       | 5 months           | fNIRS                                     | Descriptive     |
| <b>Cardenas-de-la-Parra et al., 2021</b> | A voxel-wise assessment of growth differences in infants developing autism spectrum disorder                                                                                     | Neuroimage: Clinical                 | Longitudinal;<br>N = 503                  | ASD-HR+ (n = 56), ASD-HR- (n = 285), and ASD-LR (n = 162) infants | 6, 12, & 24 months | MRI                                       | Diagnostic      |
| <b>Damiano-Goodwin et al., 2017</b>      | Developmental sequelae and neurophysiologic substrates of sensory seeking in infant siblings of children with autism spectrum disorder                                           | Developmental Cognitive Neuroscience | Longitudinal;<br>N = 40                   | ASD-HR+ (n = 6), ASD-HR- (n = 14), and ASD-LR (n = 20) infants    | 18 & 36 months     | EEG                                       | Diagnostic      |
| <b>Darki et al., 2021</b>                | T1-Weighted/T2-Weighted ratio mapping at 5 months captures individual differences in behavioral development and differentiates infants at familial risk for autism from controls | Cerebral Cortex                      | Cross-sectional;<br>N = 46                | ASD-HR (n = 29) and ASD-LR (n = 17) infants                       | ~5 months          | MRI                                       | Descriptive     |
| <b>Dickinson et al., 2021</b>            | Multivariate neural connectivity patterns in early infancy predict later autism symptoms                                                                                         | Society of Biological Psychiatry     | Longitudinal;<br>N = 65                   | ASD-HR (n = 36) and ASD-LR (n = 29) infants                       | 3 & 18 months      | EEG                                       | Diagnostic      |

|                                                  |                                                                                                                                      |                                               |                                                      |                                                                                                               |                                                      |       |             |
|--------------------------------------------------|--------------------------------------------------------------------------------------------------------------------------------------|-----------------------------------------------|------------------------------------------------------|---------------------------------------------------------------------------------------------------------------|------------------------------------------------------|-------|-------------|
| <b>Edwards et al., 2017</b>                      | Differences in neural correlates of speech perception in 3 month olds at high and low risk for autism spectrum disorder              | Journal of Autism and Developmental Disorders | Cross-sectional; N = 38                              | ASD-HR (n = 21) and ASD-LR (n = 17) infants                                                                   | 3 months                                             | fNIRS | Descriptive |
| <b>Elison et al., 2013</b>                       | White matter microstructure and atypical visual orienting in 7- month olds at risk for autism                                        | American Journal of Psychiatry                | Longitudinal; N = 97                                 | ASD-HR+ (n = 16), ASD-HR- (n = 40), and ASD-LR (n = 41) infants                                               | 7 & 25 months                                        | DTI   | Diagnostic  |
| <b>Elsabbagh et al., 2015</b>                    | Infant neural sensitivity to dynamic gaze relates to quality of parent-infant interaction at 6-8 months in infant at risk for autism | Journal of Autism and Developmental Disorders | Cross-sectional; N = 92                              | ASD-HR (n = 45) and ASD-LR (n = 47) infants                                                                   | 7 months                                             | EEG   | Descriptive |
| <b>Finch et al., 2017</b>                        | Lateralization of ERPs to speech stimuli and handedness in the early developmental of autism spectrum disorder.                      | Journal of Neurodevelopmental Disorders       | Longitudinal; N = 163                                | ASD-HR+ (n = 23), ASD-HR- (n = 67), and ASD-LR (n = 73) infants                                               | EEG at 12 months; behavioral assessment at 36 months | EEG   | Diagnostic  |
| <b>Finch, Tager-Flusberg, &amp; Nelson, 2018</b> | Neural responses to linguistic stimuli in children with and without autism spectrum disorder                                         | European Journal of Neuroscience              | Cross-sectional; N = 134 (85 contributed usable EEG) | ASD-HR+ (n = 14), ASD-HR- (n = 29), and ASD-LR (n = 42) infants                                               | 36 months                                            | EEG   | Diagnostic  |
| <b>Gabard-Durnam et al., 2015</b>                | Alpha asymmetry in infants at risk for autism spectrum disorders                                                                     | Journal of Autism and Developmental Disorders | Longitudinal; N = 108                                | ASD-HR (n = 57) and ASD-LR (n = 51) infants                                                                   | 6, 12, & 18 months                                   | EEG   | Descriptive |
| <b>Guy et al., 2017</b>                          | Neural correlates of face processing in etiologically-distinct 12-month-old infants at high-risk of autism spectrum disorder         | Developmental Cognitive Neuroscience          | Cross-sectional; N = 57                              | ASD-LR (n = 21), ASD-HR (n = 21), and infants with Fragile X Syndrome (n = 15)                                | 12 months                                            | EEG   | Descriptive |
| <b>Haarsten et al., 2019</b>                     | Functional EEG connectivity in infants associates with later restricted and repetitive behaviours in autism; a replication study     | Translational Psychiatry                      | Longitudinal; N = 101                                | ASD-HR+ (n = 13), ASD-HR- (n = 47), ASD-HR showing atypical development (n = 21), and ASD-LR (n = 47) infants | 14 months old (13 - 18 months)                       | EEG   | Diagnostic  |

|                              |                                                                                                                                                                      |                                         |                                                                      |                                                                   |                                                               |       |             |
|------------------------------|----------------------------------------------------------------------------------------------------------------------------------------------------------------------|-----------------------------------------|----------------------------------------------------------------------|-------------------------------------------------------------------|---------------------------------------------------------------|-------|-------------|
| <b>Hazlett et al., 2012</b>  | Brain volume findings in 6-month-old infants at high familial risk for autism                                                                                        | American Journal of Psychiatry          | Cross-sectional; N = 134                                             | ASD-HR (n = 98) and ASD-LR (n = 36) infants                       | 6 months                                                      | MRI   | Descriptive |
| <b>Hazlett et al., 2017</b>  | Early brain development in infants at high risk for autism spectrum disorder                                                                                         | Nature                                  | Longitudinal; N = 435                                                | ASD-HR+ (n = 70), ASD-HR- (n = 248), and ASD-LR (n = 117) infants | 6, 12, & 24 months                                            | MRI   | Diagnostic  |
| <b>Jones et al., 2016</b>    | Reduced engagement with social stimuli in 6-month-old infants with later autism spectrum disorder: A longitudinal prospective study of infants at high familial risk | Journal of Neurodevelopmental Disorders | Longitudinal; N = 88                                                 | ASD-HR (n = 43) and ASD-LR (n = 45) infants                       | 6, 12, 18, & 24 months                                        | EEG   | Diagnostic  |
| <b>Jones et al., 2017</b>    | Parent-delivered early intervention in infants at risk for autism spectrum disorder: Effects on electrophysiological and habituation measures of social attention    | Autism Research                         | Longitudinal; N = 33                                                 | ASD-HR infants (n = 33)                                           | EEG at 6, 12, & 18 months; intervention between 9 - 11 months | EEG   | Descriptive |
| <b>Keehn et al., 2013</b>    | Functional connectivity in the first year of life in infants at-risk for autism: A preliminary near-infrared spectroscopy study                                      | Frontiers in Human Neuroscience         | Longitudinal; N = 64                                                 | ASD-HR (n = 27) and ASD-LR (n = 37) infants                       | 3,6,9, & 12-months                                            | fNIRS | Descriptive |
| <b>Keehn et al., 2015</b>    | Atypical hemispheric specialization for faces in infants-at-risk for autism spectrum disorder                                                                        | Autism Research                         | Longitudinal; N = 95 (60 with longitudinal data/diagnostic outcomes) | ASD-HR+ (n = 10), ASD-HR- (n = 24), and ASD-LR (n = 26) infants   | 6 & 12 months                                                 | EEG   | Diagnostic  |
| <b>Key &amp; Stone, 2012</b> | Processing of novel and familiar faces in infants at average and high risk for autism                                                                                | Developmental Cognitive Neuroscience    | Cross-sectional; N = 35                                              | ASD-HR (n = 15) and ASD-LR (n = 20) infants                       | 9 months                                                      | EEG   | Descriptive |
| <b>Key &amp; Stone, 2012</b> | Same but different: Nine-month-old infants at low and high risk for autism look at the same facial features but process them                                         | Autism Research                         | Cross-sectional; N = 35                                              | ASD-HR (n = 15) and ASD-LR (n = 20) infants                       | 9 months                                                      | EEG   | Descriptive |

|                               |                                                                                                                               |                                               |                                                    |                                                                                                         |                                      |       |             |
|-------------------------------|-------------------------------------------------------------------------------------------------------------------------------|-----------------------------------------------|----------------------------------------------------|---------------------------------------------------------------------------------------------------------|--------------------------------------|-------|-------------|
|                               | using different brain mechanisms                                                                                              |                                               |                                                    |                                                                                                         |                                      |       |             |
| <b>Key et al., 2015</b>       | Positive affect processing and joint attention in infants at high risk for autism: An exploratory study                       | Journal of Autism and Developmental Disorders | Longitudinal; N = 31                               | ASD-HR (n = 16) and ASD-LR (n = 15) infants                                                             | 9-15 months                          | EEG   | Descriptive |
| <b>Kolesnik et al., 2019</b>  | Increased cortical reactivity to repeated tones at 8 months in infants with later autism spectrum disorder                    | Translational Psychiatry                      | Longitudinal; N = 143                              | ASD-HR (n = 116; 14 of which were later ASD-HR+) and ASD-LR (n = 27) infants                            | 8 & 14 months, 2 & 3 years           | EEG   | Diagnostic  |
| <b>Levin et al., 2017</b>     | EEG power at 3 months in infants at high familial risk for autism                                                             | Journal of Neurodevelopmental Disorders       | Longitudinal; N = 48                               | ASD-HR (n = 29; 25 with sufficient EEG data, 7 of which were later ASD-HR+) and ASD-LR (n = 19) infants | 3, 6, 9, 12, 18, 24, & 36 months     | EEG   | Diagnostic  |
| <b>Lewis et al., 2017</b>     | The emergence of network inefficiencies in infants with autism spectrum disorder                                              | Biological Psychiatry                         | Longitudinal; N = 260 (116 with longitudinal data) | ASD-HR+ (n = 15), ASD-HR- (n = 66), and ASD-LR (n = 35) infants                                         | 6 & 12 months                        | MRI   | Diagnostic  |
| <b>Liu et al., 2020</b>       | Emerging atypicalities in functional connectivity of language-related networks in young infants at high familial risk for ASD | Developmental Cognitive Neuroscience          | Longitudinal; N = 65                               | ASD-HR (n = 33) and ASD-LR (n = 32) infants                                                             | 1.5 - 9 months                       | fMRI  | Descriptive |
| <b>Liu et al., 2019</b>       | Altered lateralization of dorsal language tracts in 6-week-old infants at risk for autism                                     | Developmental Science                         | Longitudinal; N = 34                               | ASD-HR (n = 19) and ASD-LR (n = 15) infants                                                             | 6 weeks, 18 months, & 36 months      | DTI   | Diagnostic  |
| <b>Lloyd-Fox et al., 2013</b> | Reduced neural sensitivity to social stimuli in infants at risk for autism                                                    | Proceedings of the Royal Society B            | Cross-sectional; N = 34                            | ASD-HR (n=18) and ASD-LR (n=16) infants                                                                 | 4 – 6 months                         | fNIRS | Descriptive |
| <b>Lloyd-Fox et al., 2018</b> | Cortical responses before 6 months of life associate with later autism                                                        | European Journal of Neuroscience              | Longitudinal; N = 36                               | ASD-HR+ (n = 5), ASD-HR- (n = 15), and ASD-LR (n = 16) infants                                          | 4 - 6 months; follow-up at 36 months | fNIRS | Diagnostic  |
| <b>Luyster et al., 2011</b>   | Neural correlates of familiar and unfamiliar face                                                                             | Brain Topography                              | Cross-sectional; N = 56                            | ASD-HR (n = 32) and ASD-LR (n = 24) infants                                                             | 12 months                            | EEG   | Descriptive |

|                               |                                                                                                                                                                                                 |                                         |                         |                                                                                                      |                                    |                                  |             |
|-------------------------------|-------------------------------------------------------------------------------------------------------------------------------------------------------------------------------------------------|-----------------------------------------|-------------------------|------------------------------------------------------------------------------------------------------|------------------------------------|----------------------------------|-------------|
|                               | processing in infants at risk for autism                                                                                                                                                        |                                         |                         |                                                                                                      |                                    |                                  |             |
| <b>Luyster et al., 2014</b>   | Neural measures of social attention across the first years of life: Characterizing typical development and markers of autism risk                                                               | Developmental Cognitive Neuroscience    | Longitudinal; N = 260   | ASD-HR (n = 123) and ASD-LR (n = 137) infants                                                        | 6 - 36 months                      | EEG                              | Descriptive |
| <b>MacDuffie et al., 2020</b> | Sleep onset problems and subcortical development in infants later diagnosed with autism spectrum disorder                                                                                       | American Journal of Psychiatry          | Longitudinal; N = 432   | ASD-HR+ (n = 71), ASD-HR- (n = 234), and ASD-LR (n = 127) infants                                    | 6, 12, & 24 months                 | MRI                              | Diagnostic  |
| <b>McCleery et al., 2009</b>  | Atypical face versus object processing and hemispheric asymmetries in 10-month-old infants at risk for autism                                                                                   | Biological Psychiatry                   | Cross-sectional; N = 40 | ASD-HR (n = 20) and ASD-LR (n = 20) infants                                                          | 10 months                          | EEG                              | Descriptive |
| <b>McKinnon et al., 2019</b>  | Restricted and repetitive behavior and brain functional connectivity in infants at risk for developing autism spectrum disorder                                                                 | Biological Psychiatry                   | Longitudinal; N = 38    | Infants; some meeting criteria for ASD diagnosis (n = 20) and some not meeting the criteria (n = 18) | 12 & 24 months                     | fMRI                             | Diagnostic  |
| <b>Nair et al., 2021</b>      | Altered thalamocortical connectivity in 6-week-old infants at high familial risk for autism spectrum disorder                                                                                   | Cerebral Cortex                         | Longitudinal; N = 52    | ASD-HR (n = 24) and ASD-LR (n = 28) infants                                                          | 6 weeks; later follow-up           | Functional connectivity MRI, DTI | Diagnostic  |
| <b>Orekhova et al., 2014</b>  | EEG hyper-connectivity in high-risk infant is associated with later autism                                                                                                                      | Journal of Neurodevelopmental Disorders | Longitudinal; N = 54    | ASD-HR+ (n = 10), ASD-HR- (n = 18), and ASD-LR (n = 28) infants                                      | EEG at 14 months; ASD at 36 months | EEG                              | Diagnostic  |
| <b>Pecukonis et al., 2021</b> | Exploring the relation between brain response to speech at 6-months and language outcomes at 24-months in infants at high and ASD-LR: A preliminary functional near-infrared spectroscopy study | Developmental Cognitive Neuroscience    | Longitudinal; N = 32    | ASD-HR+ (n = 5), ASD-HR- (n = 9), and ASD-LR (n = 18) infants                                        | 6 & 24 months                      | fNIRS                            | Diagnostic  |

|                                                  |                                                                                                                                                          |                                         |                         |                                                                             |                                                |     |             |
|--------------------------------------------------|----------------------------------------------------------------------------------------------------------------------------------------------------------|-----------------------------------------|-------------------------|-----------------------------------------------------------------------------|------------------------------------------------|-----|-------------|
| <b>Peterson et al., 2021</b>                     | Evidence for normal extra-axial cerebrospinal fluid volume in autistic males from middle childhood to adulthood                                          | Neuroimage                              | Longitudinal; N = 189   | Autistic (n = 92) and non-autistic (n = 97) males                           | 3 - 42 years                                   | MRI | Descriptive |
| <b>Pote et al., 2019</b>                         | Familial risk of autism alters subcortical and cerebellar brain anatomy in infants and predicts the emergence of repetitive behaviors in early childhood | Autism Research                         | Longitudinal; N = 50    | ASD-HR (n = 24) and ASD-LR (n = 26) infants                                 | 4 - 6 months & 36 months                       | MRI | Diagnostic  |
| <b>Righi et al., 2014</b>                        | Functional connectivity in the first year of life in infants at risk for autism spectrum disorder: An EEG study                                          | PLOS One                                | Longitudinal; N = 54    | ASD-HR (n = 28) and ASD-LR (n = 26) infants                                 | 6 - 12 months                                  | EEG | Diagnostic  |
| <b>Schumann et al., 2010</b>                     | Longitudinal magnetic resonance imaging study of cortical development through early childhood in autism                                                  | The Journal of Neuroscience             | Longitudinal; N = 85    | Toddlers with ASD symptoms (n = 41) and without ASD symptoms (n = 44)       | 1.5 - 5 years                                  | MRI | Descriptive |
| <b>Seery et al., 2013</b>                        | Atypical lateralization of ERP response to native and non-native speech in infants at risk for autism spectrum disorder                                  | Developmental Cognitive Neuroscience    | Longitudinal; N = 108   | ASD-HR (n = 62) and ASD-LR (n = 46) infants                                 | 6, 9, & 12 months                              | EEG | Descriptive |
| <b>Seery, Tager-Flusberg, &amp; Nelson, 2014</b> | Event-related potentials to repeated speech in 9-month-old infants at risk for autism spectrum disorder                                                  | Journal of Neurodevelopmental Disorders | Cross-sectional; N = 80 | ASD-HR (n = 35) and ASD-LR (n = 45) infants                                 | 9 months                                       | EEG | Descriptive |
| <b>Shen et al., 2013</b>                         | Early brain enlargement and elevated extra-axial fluid in infants who develop autism spectrum disorder                                                   | Brain                                   | Longitudinal; N = 55    | ASD-HR (n = 33; 10 of which were later ASD-HR+) and ASD-LR (n = 22) infants | 6 - 9 months, 12 - 15 months, & 18 - 24 months | MRI | Diagnostic  |
| <b>Shen et al., 2017</b>                         | Increased extra-axial cerebrospinal fluid in high-risk infants who later develop autism                                                                  | Biological Psychiatry                   | Longitudinal; N = 343   | ASD-HR+ (n = 47), ASD-HR- (n = 174), and ASD-LR (n = 122) infants           | 6, 12, & 24 months                             | MRI | Diagnostic  |

|                               |                                                                                                                                            |                                               |                          |                                                                                                        |                                                       |           |             |
|-------------------------------|--------------------------------------------------------------------------------------------------------------------------------------------|-----------------------------------------------|--------------------------|--------------------------------------------------------------------------------------------------------|-------------------------------------------------------|-----------|-------------|
| <b>Simon et al., 2017</b>     | Neural correlates of sensory hypo-responsiveness in toddlers at high risk for autism spectrum disorder                                     | Journal of Autism and Developmental Disorders | Cross-sectional; N = 22  | ASD-HR infants (n = 22)                                                                                | 18 months                                             | EEG       | Descriptive |
| <b>Swanson et al., 2017</b>   | Subcortical brain and behavior phenotypes differentiate infants with autism versus language delay                                          | Biological Psychiatry                         | Longitudinal; N = 525    | ASD-HR+ (n = 86), ASD-HR- (n = 255), ASD-HR with language delay (n = 41), and ASD-LR (n = 143) infants | 6, 12, & 24 months                                    | MRI       | Diagnostic  |
| <b>Tierney et al., 2012</b>   | Developmental trajectories of resting EEG power: An endophenotype of autism spectrum disorder                                              | PLOS One                                      | Longitudinal; N = 122    | ASD-HR (n = 65) and ASD-LR (n = 57) infants                                                            | 6, 9, 12, 18, & 24 months                             | EEG       | Descriptive |
| <b>Wilkinson et al., 2019</b> | Reduced frontal gamma power at 24 months is associated with better expressive language in toddlers at risk for autism                      | Autism Research                               | Cross sectional; N = 101 | ASD HR+ (n = 16), ASD-HR- (n = 42), and ASD-LR (n = 43) infants                                        | EEG at 24 months; ASD assessment between 24-36 months | EEG       | Diagnostic  |
| <b>Wilkinson et al., 2019</b> | Use of longitudinal EEG measures in estimating language development in infants with and without familial risk for autism spectrum disorder | Neurobiology of Language                      | Longitudinal; N = 130    | ASD-HR+ (n = 21), ASD-HR- (n = 51), and ASD-LR (n = 58) infants                                        | 3 - 24 months                                         | EEG       | Diagnostic  |
| <b>Wolff et al. 2012</b>      | Differences in white matter fiber tract development present from 6 to 24 months in infants with autism                                     | American Journal of Psychiatry                | Longitudinal; N = 92     | ASD-HR+ (n = 28) and ASD-LR (n = 64) infants                                                           | 6, 12, & 24 months                                    | DTI       | Diagnostic  |
| <b>Wolff et al., 2015</b>     | Altered corpus callosum morphology associated with autism over the first 2 years of life                                                   | Brain                                         | Longitudinal; N = 378    | ASD-HR+ (n = 57), ASD-HR- (n = 213), and ASD-LR (n = 108) infants                                      | 6, 12, & 24 months                                    | DTI & MRI | Diagnostic  |

**Table Key:**

| <b>Abbreviation:</b> | <b>Definition:</b>                            |
|----------------------|-----------------------------------------------|
| ASD                  | Autism Spectrum Disorder                      |
| ASD-HR               | High Risk for ASD (due to familial diagnosis) |
| ASD-HR+              | High Risk for ASD; ASD Diagnosis Confirmed    |
| ASD-HR-              | High Risk for ASD; NoASD Diagnosis Received   |
| ASD-LR               | Low Risk for ASD                              |
| fMRI                 | Functional Magnetic Resonance Imaging         |
| MRI                  | Magnetic Resonance Imaging                    |
| EEG                  | Electroencephalography                        |
| fNIRS                | Functional Near-Infrared Spectroscopy         |
| DTI                  | Diffusion Tensor Imaging                      |
